# Supplementary material
Source: PubMed Central journal article supplement (PMC10372759)
Supplement: jamadermatol-e232217-s002.pdf [file jamadermatol-e232217-s002.pdf]

## Supplemental Online Content

Sun Q, Broadaway KA, Edmiston SN, et al. Genetic variants associated with hidradenitis suppurativa. *JAMA Dermatol*. Published online July 26, 2023. doi:10.1001/jamadermatol.2023.2217

**eFigure 1.** Genetic variants associated with HS in ProCARE patients and AddHealth controls

**eFigure 2.** Genetic variants associated with HS in ProCARE patients and AddHealth controls of primarily European ancestry

**eFigure 3.** Genetic variants associated with HS in ProCARE patients and AddHealth controls of primarily African ancestry

**eFigure 4.** QQ plot of GWAS for ProCARE patients and AddHealth controls

**eFigure 5.** QQ plot of GWAS for ProCARE patients and AddHealth controls of primarily European ancestry

**eFigure 6.** QQ plot of GWAS for ProCARE patients and AddHealth controls of primarily African ancestry

**eFigure 7.** HS association plots for two loci colored based on African LD

**eFigure 8.** HS association plots for two loci with recombination rates

This supplemental material has been provided by the authors to give readers additional information about their work.

**eFigure 1. Genetic variants associated with HS in ProCARE patients and AddHealth controls.**

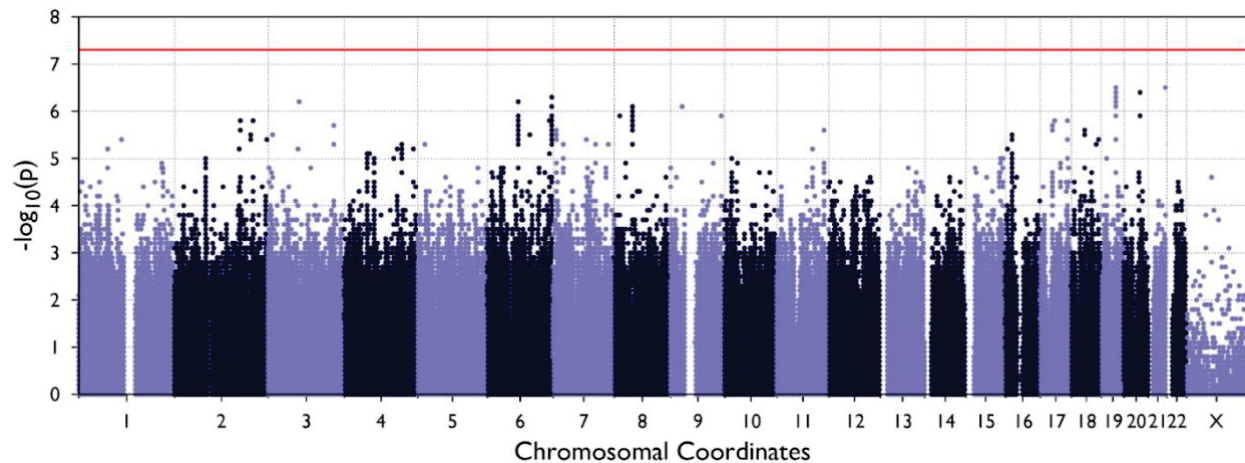

Each dot corresponds to one variant, the X-axis indicates genomic position, and the Y- axis shows the  $-\log_{10}(p\text{-value})$  of variant association with HS. No variant showed genome-wide significant ( $p < 5 \times 10^{-8}$ ) evidence of association (red line).

**eFigure 2. Genetic variants associated with HS in ProCARE patients and AddHealth controls of primarily European ancestry.**

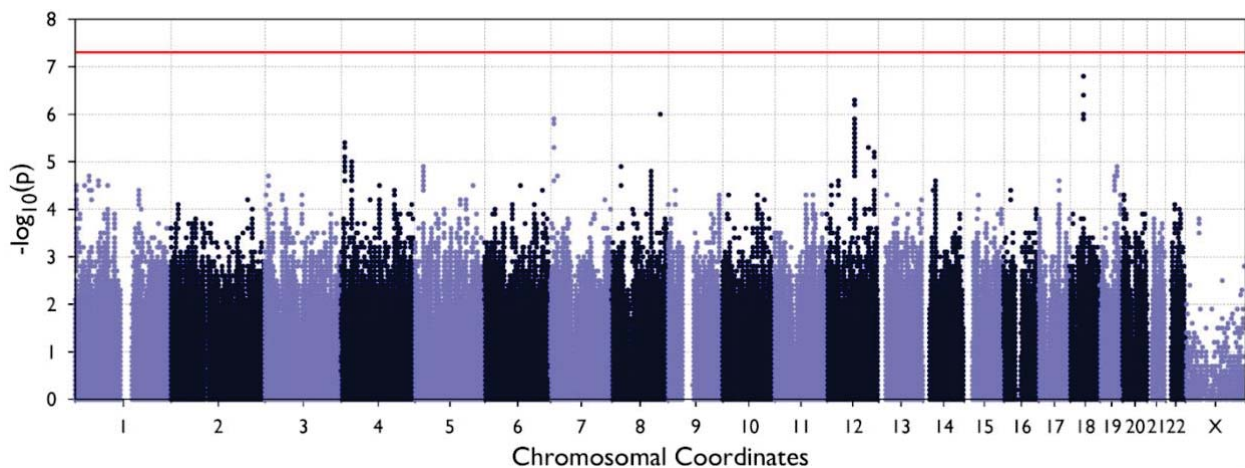

Each dot corresponds to one variant, the X-axis indicates genomic position, and the Y- axis shows the  $-\log_{10}(p\text{-value})$  of variant association with HS. No variant showed genome-wide significant ( $p < 5 \times 10^{-8}$ ) evidence of association (red line).

**eFigure 3. Genetic variants associated with HS in ProCARE patients and AddHealth controls of primarily African ancestry.**

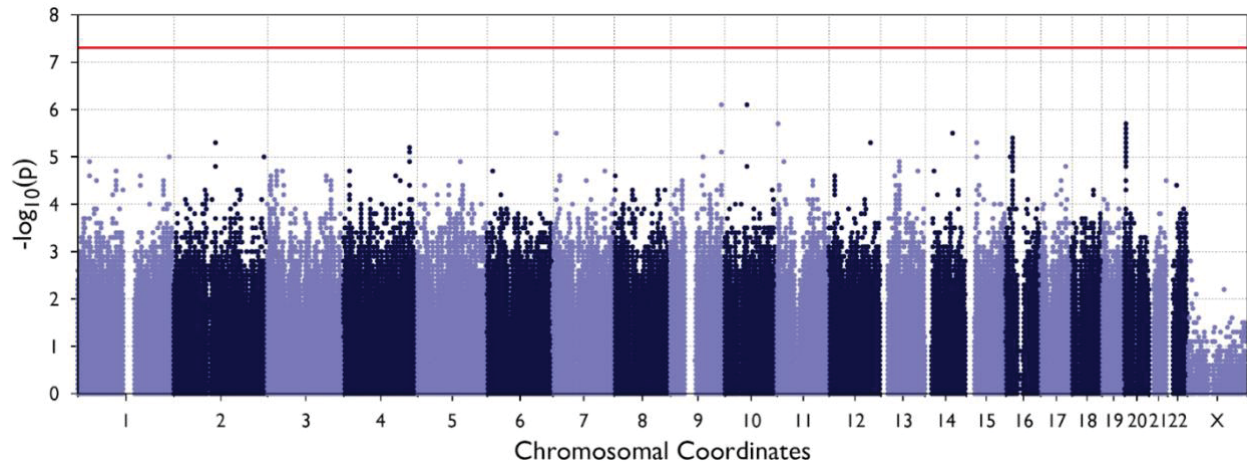

**eFigure 4. QQ plot of GWAS for ProCARE patients and AddHealth controls.**

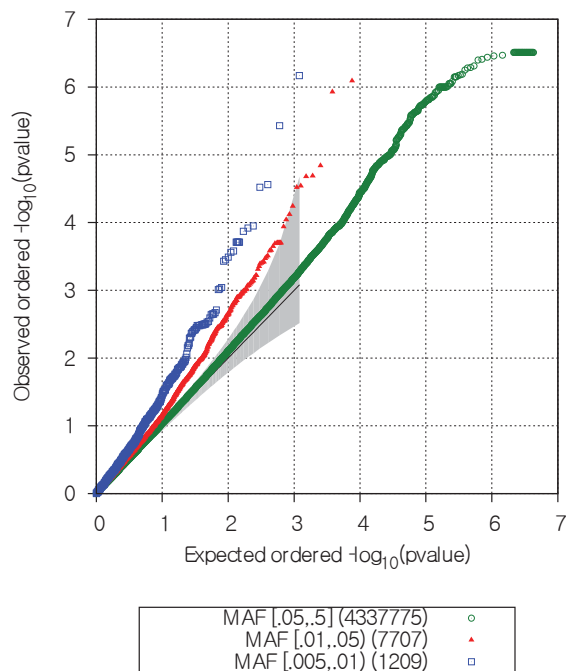

Each dot corresponds to one variant. Variants are grouped into three different MAF categories in different colors. The genomic control coefficient  $\lambda = 1.05$ .

**eFigure 5. QQ plot of GWAS for ProCARE patients and AddHealth controls of primarily European ancestry.**

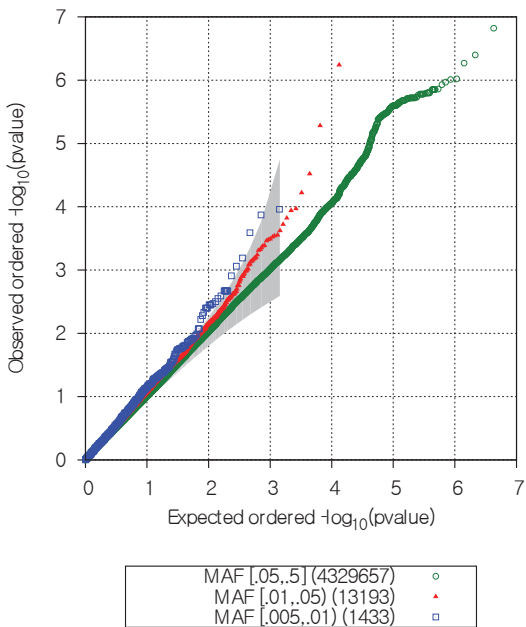

Each dot corresponds to one variant. Variants are grouped into three different MAF categories in different colors. The genomic control coefficient  $\lambda = 1.01$ .

**eFigure 6. QQ plot of GWAS for ProCARE patients and AddHealth controls of primarily African ancestry.**

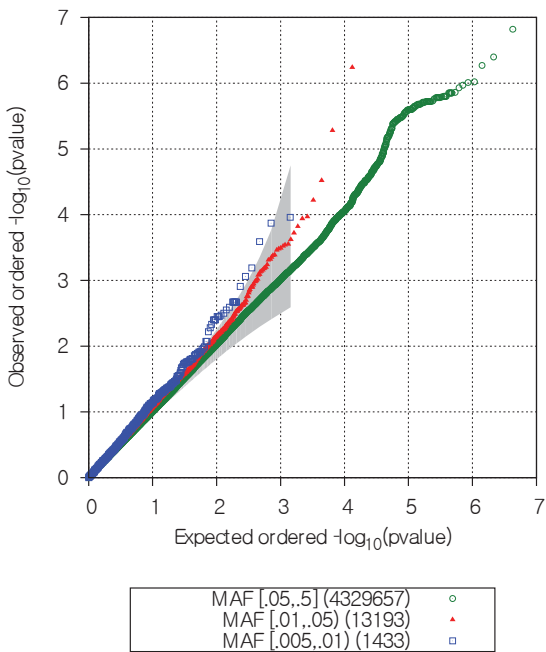

Each dot corresponds to one variant. Variants are grouped into three different MAF categories in different colors. The genomic control coefficient  $\lambda = 1.00$ .

**eFigure 7. HS association plots for two loci colored based on African LD.**

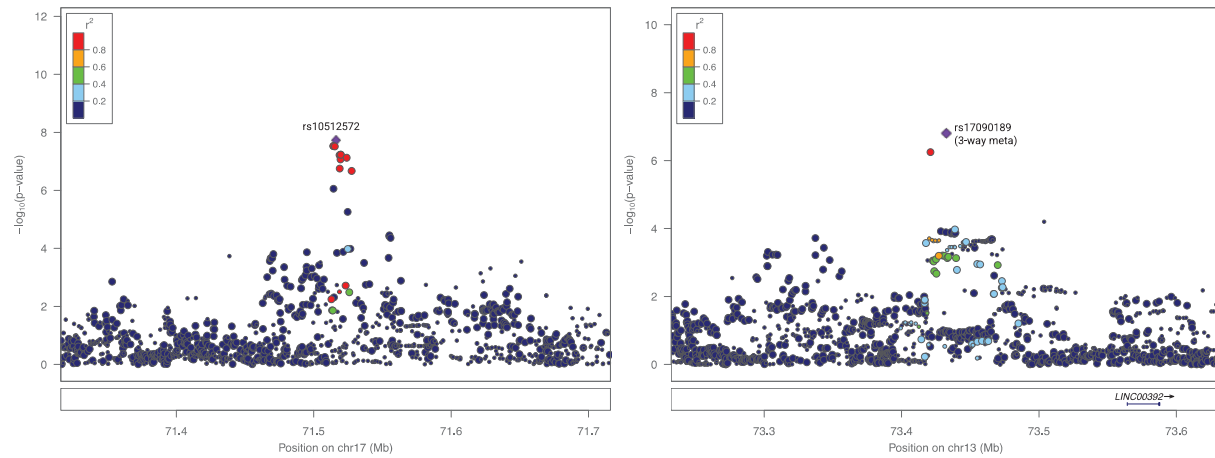

Variants associated with HS in the 3-way meta-analysis located at the chr17 locus (left) and the chr13 locus (right). Each point corresponds to one variant, the X-axis indicates genomic position, the Y-axis shows the  $-\log_{10}(\text{p-value})$  of variant association with HS, and the size of each point indicates relative sample size analyzed for that variant. Variants are colored according to their linkage disequilibrium (LD)  $r^2$  with the most significant variant in each region, which is shown as a purple diamond. LD  $r^2$  values are based on TOP-LD African ancestry individuals. The nearest protein-coding genes are not located within the 400-kilobase regions shown.

**eFigure 8. HS association plots for two loci with recombination rates.**

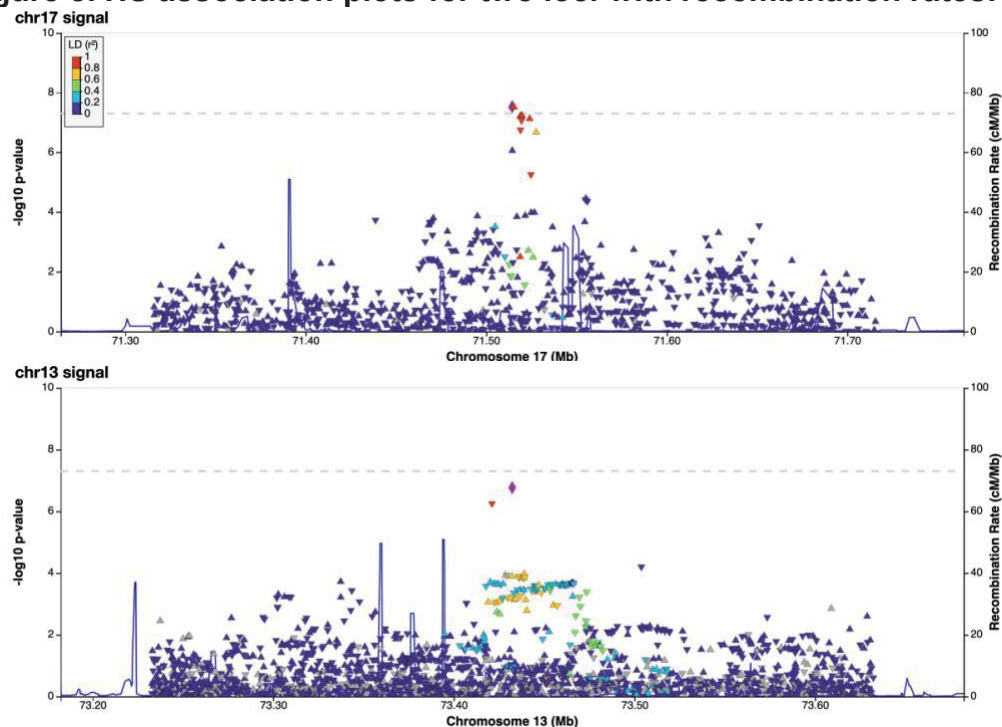

Variants associated with HS in the 3-way meta-analysis located at the chr17 locus (top) and the chr13 locus (bottom). Each point corresponds to one variant, the X-axis indicates genomic position, the left Y-axis shows the  $-\log_{10}(\text{p-value})$  of variant association with HS, the right Y-axis shows the recombination rate, and the size of each point indicates relative sample size analyzed for that variant. Variants are colored according to their linkage disequilibrium (LD)  $r^2$  with the most significant variant in each region, which is shown as a purple diamond. LD  $r^2$  values are based on 1000G European ancestry individuals. Recombination rates are from 1000G.
