# Supplementary material
Source: PubMed Central journal article supplement (PMC10372759)
Supplement: jamadermatol-e232217-s003.pdf [file jamadermatol-e232217-s003.pdf]

## Data Sharing Statement

Sun. Genetic Variants Associated With Hidradenitis Suppurativa. *JAMA Dermatol.* Published July 26, 2023. doi:10.1001/jamadermatol.2023.2217

### Data

**Data available:** Yes

**Data types:** Deidentified participant data

**How to access data:** The study will be registered in dbGaP. Data generated from the ProCARE patients will be shared through unrestricted-access NIH-designated data repositories at <https://www.ncbi.nlm.nih.gov/gap/> at the time of publication, including individual- and aggregate-level array-derived genotype data and individual-level phenotype data. The AddHealth data could be available through dbGAP phs001367.v1.p1, and BioVU data are available through dbGAP phs000888.v1.p1, phs000360.v3.p1 and phs000297.v1.p1. The UKB genotype data are available through request to UK Biobank (<https://www.ukbiobank.ac.uk>)

**When available:** With publication

### Supporting Documents

**Document types:** None

### Additional Information

**Who can access the data:** Data generated from HS ProCARE will be shared through unrestricted-access NIH-designated data repositories.

**Types of analyses:** Access will not be restricted based on the type of analysis.

**Mechanisms of data availability:** The study will be registered in dbGaP. Data generated from the ProCARE patients will be shared through unrestricted-access NIH-designated data repositories at <https://www.ncbi.nlm.nih.gov/gap/> at the time of publication, including individual- and aggregate-level array-derived genotype data and individual-level phenotype data. The AddHealth data could be available through dbGAP phs001367.v1.p1, and BioVU data are available through dbGAP phs000888.v1.p1, phs000360.v3.p1 and phs000297.v1.p1. The UKB genotype data are available through request to UK Biobank (<https://www.ukbiobank.ac.uk>)

**Any additional restrictions:** None.
